# Supplementary material
Source: PubMed Central journal article supplement (PMC4911257)

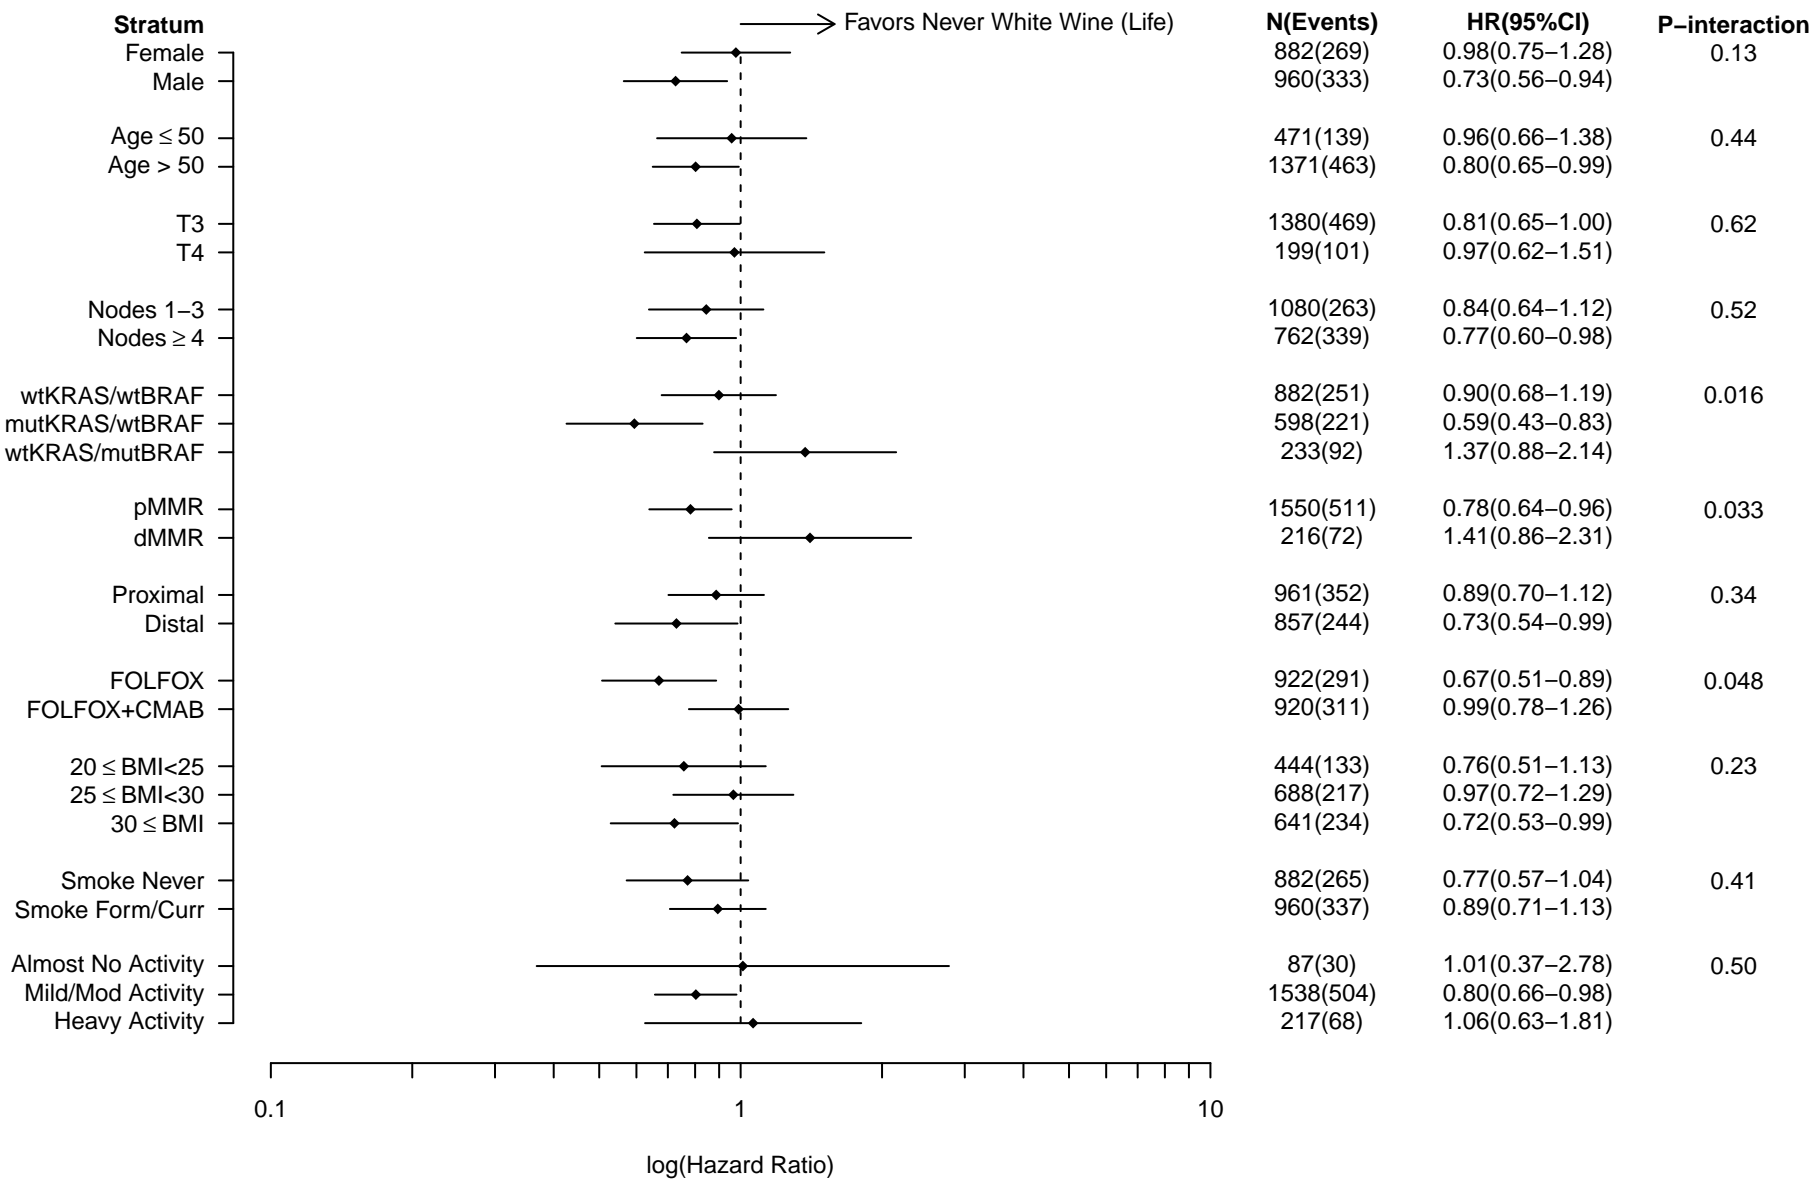

Supplement: NIHMS776281-supplement-Supp_Figure_S1.pdf [file NIHMS776281-supplement-Supp_Figure_S1.pdf]
